# Supplementary material
Source: Springer Nature journal article supplement (https://www.springermedizin.de/resource/supplementary/12960_2009_218_MOESM2_ESM.pdf/9570726)

# Logic Pathway and Benefit Chain

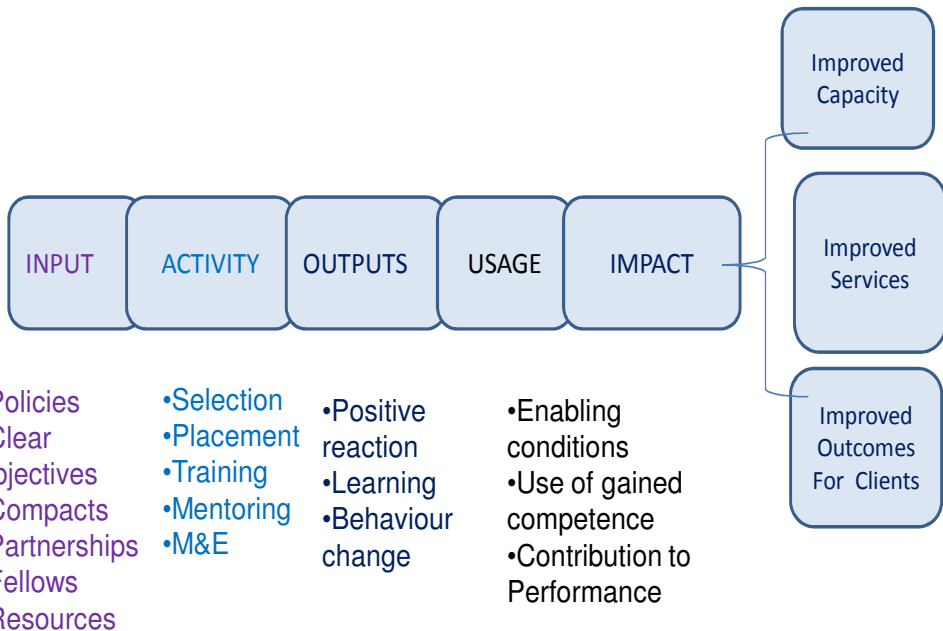

Supplement: MOESM2 [file 9570726]
